# Supplementary material
Source: HighWire-hosted journal article supplement (https://bmjopen.bmj.com/content/12/7/e061013)
Supplement: inline-supplementary-material-1 [file inline-supplementary-material-1.pdf]

## Smoking in social housing among adults in England, 2015-2020: a nationally representative survey

Sarah E. Jackson<sup>1,2</sup>, Hazel Cheeseman<sup>3</sup>, Deborah Arnott<sup>3</sup>, Robbie Titmarsh<sup>3</sup>, Jamie Brown<sup>1,2</sup>

<sup>1</sup> Department of Behavioural Science and Health, University College London, London, UK

<sup>2</sup> SPECTRUM Consortium, UK

<sup>3</sup> Action on Smoking and Health, London, UK

### Supplementary material

Supplementary Table 1. Interactions between housing tenure and age group

Supplementary Table 2. Interactions between housing tenure and sex

Supplementary Table 3. Association between use of evidence-based support and cessation among past-year smokers who made a quit attempt: interaction with housing tenure

Supplementary Table 4. Sensitivity analysis using log-binomial regression to test associations between housing tenure and smoking and cessation behaviour

**Supplementary Table 1.** Interactions between housing tenure and age group

|                                         | 35-64 (vs. 16-34) |                |          | ≥65 (vs. 16-34) |                |          |
|-----------------------------------------|-------------------|----------------|----------|-----------------|----------------|----------|
|                                         | OR/B*             | 95% CI         | <i>p</i> | OR/B            | 95% CI         | <i>p</i> |
| <i>All adults</i>                       |                   |                |          |                 |                |          |
| % Cigarette smokers                     | 1.42              | 1.30 to 1.55   | <0.001   | 1.37            | 1.20 to 1.56   | <0.001   |
| <i>Current cigarette smokers</i>        |                   |                |          |                 |                |          |
| Mean cigarettes per day                 | -0.97             | -1.53 to -0.41 | 0.001    | -1.86           | -2.75 to -0.96 | <0.001   |
| % First smoke within 30 min of waking   | 0.86              | 0.74 to 1.00   | 0.043    | 0.59            | 0.47 to 0.74   | <0.001   |
| % High motivation to stop               | 1.00              | 0.82 to 1.22   | 0.994    | 0.90            | 0.61 to 1.34   | 0.611    |
| % Regular exposure to smoking by others | 1.22              | 1.04 to 1.43   | 0.015    | 1.48            | 1.17 to 1.88   | 0.001    |
| <i>Past-year smokers</i>                |                   |                |          |                 |                |          |
| % Past year quit attempt                | 1.15              | 0.99 to 1.33   | 0.069    | 1.02            | 0.78 to 1.32   | 0.912    |
| <i>Past year quit attempt</i>           |                   |                |          |                 |                |          |
| % Not currently smoking                 | 0.92              | 0.64 to 1.32   | 0.645    | 1.14            | 0.60 to 2.17   | 0.682    |
| % Used any cessation support**          | 0.77              | 0.60 to 0.99   | 0.037    | 0.79            | 0.50 to 1.24   | 0.299    |
| % Used behavioural support              | 0.62              | 0.26 to 1.49   | 0.284    | 0.37            | 0.11 to 1.24   | 0.107    |
| % Used NRT OTC                          | 0.74              | 0.51 to 1.07   | 0.112    | 1.17            | 0.64 to 2.12   | 0.616    |
| % Used e-cigarettes                     | 0.84              | 0.65 to 1.08   | 0.177    | 0.73            | 0.42 to 1.26   | 0.261    |
| % Used prescription medication          | 0.98              | 0.60 to 1.60   | 0.930    | 0.83            | 0.39 to 1.79   | 0.637    |

\* OR/B adjusted for sex, age, social grade, government office region, and survey year. \*\*Any cessation support includes behavioural support, nicotine replacement therapy (NRT) bought over-the-counter (OTC), e-cigarettes, and prescription medication.

**Supplementary Table 2.** Interactions between housing tenure and sex

|                                         | Female (vs. male) |               |          |
|-----------------------------------------|-------------------|---------------|----------|
|                                         | OR/B*             | 95% CI        | <i>p</i> |
| <i>All adults</i>                       |                   |               |          |
| % Cigarette smokers                     | 1.11              | 1.02 to 1.20  | 0.014    |
| <i>Current cigarette smokers</i>        |                   |               |          |
| Mean cigarettes per day                 | -0.11             | -0.64 to 0.42 | 0.678    |
| % First smoke within 30 min of waking   | 1.02              | 0.89 to 1.17  | 0.805    |
| % High motivation to stop               | 0.90              | 0.74 to 1.09  | 0.283    |
| % Regular exposure to smoking by others | 0.93              | 0.80 to 1.07  | 0.302    |
| <i>Past-year smokers</i>                |                   |               |          |
| % Past year quit attempt                | 0.97              | 0.84 to 1.11  | 0.640    |
| <i>Past year quit attempt</i>           |                   |               |          |
| % Not currently smoking                 | 1.02              | 0.72 to 1.45  | 0.901    |
| % Used any cessation support**          | 1.23              | 0.97 to 1.56  | 0.093    |
| % Used behavioural support              | 0.82              | 0.39 to 1.74  | 0.605    |
| % Used NRT OTC                          | 1.13              | 0.80 to 1.61  | 0.486    |
| % Used e-cigarettes                     | 1.14              | 0.89 to 1.47  | 0.308    |
| % Used prescription medication          | 1.13              | 0.74 to 1.74  | 0.571    |

\* OR/B adjusted for sex, age, social grade, government office region, and survey year. \*\*Any cessation support includes behavioural support, nicotine replacement therapy (NRT) bought over-the-counter (OTC), e-cigarettes, and prescription medication.

**Supplementary Table 3.** Association between use of evidence-based support and cessation among past-year smokers who made a quit attempt: interaction with housing tenure

|                                                           | Not currently smoking |           |          |
|-----------------------------------------------------------|-----------------------|-----------|----------|
|                                                           | OR*                   | 95% CI    | <i>p</i> |
| Used any cessation support**                              | 1.11                  | 0.94-1.30 | 0.218    |
| Housing tenure                                            | 0.62                  | 0.46-0.84 | 0.002    |
| Used any cessation support x housing tenure (interaction) | 0.93                  | 0.64-1.34 | 0.684    |

\*OR adjusted for sex, age, social grade, government office region, survey year, mean cigarettes per day, and smoking first cigarette within 30 minutes of waking.

\*\*Any cessation support includes behavioural support, nicotine replacement therapy (NRT) bought over-the-counter (OTC), e-cigarettes, and prescription medication.

**Supplementary Table 4.** Sensitivity analysis using log-binomial regression to test associations between housing tenure and smoking and cessation behaviour

|                                         | Social housing | Other housing | Unadjusted |              |          | Adjusted* |              |          |
|-----------------------------------------|----------------|---------------|------------|--------------|----------|-----------|--------------|----------|
|                                         |                |               | RR         | 95% CI       | <i>p</i> | RR        | 95% CI       | <i>p</i> |
| <b>All adults</b>                       |                |               |            |              |          |           |              |          |
| % Cigarette smokers                     | 33.5           | 14.8          | 2.29       | 2.21 to 2.37 | <0.001   | 1.73      | 1.66 to 1.80 | <0.001   |
| <b>Current cigarette smokers</b>        |                |               |            |              |          |           |              |          |
| % First smoke within 30 min of waking   | 57.4           | 42.6          | 1.34       | 1.27 to 1.42 | <0.001   | 1.20      | 1.13 to 1.28 | <0.001   |
| % High motivation to stop               | 14.7           | 15.0          | 0.97       | 0.89 to 1.07 | 0.555    | 1.02      | 0.93 to 1.13 | 0.689    |
| % Regular exposure to smoking by others | 68.4           | 68.6          | 1.01       | 0.96 to 1.06 | 0.854    | 1.01      | 0.96 to 1.07 | 0.687    |
| <b>Past-year smokers</b>                |                |               |            |              |          |           |              |          |
| % Past-year quit attempt                | 32.4           | 30.9          | 1.06       | 0.99 to 1.13 | 0.088    | 1.11      | 1.03 to 1.19 | 0.005    |
| <b>Past-year quit attempt</b>           |                |               |            |              |          |           |              |          |
| % Not currently smoking                 | 11.6           | 18.9          | 0.62       | 0.52 to 0.73 | <0.001   | 0.69      | 0.58 to 0.82 | <0.001   |
| % Used any cessation support**          | 59.0           | 54.4          | 1.10       | 1.00 to 1.20 | 0.051    | 1.09      | 0.99 to 1.21 | 0.086    |
| % Used behavioural support              | 2.8            | 2.2           | 1.27       | 0.90 to 1.79 | 0.180    | 1.27      | 0.86 to 1.87 | 0.237    |
| % Used NRT OTC                          | 13.4           | 13.0          | 1.06       | 0.90 to 1.24 | 0.507    | 0.91      | 0.76 to 1.09 | 0.305    |
| % Used e-cigarettes                     | 33.9           | 32.1          | 1.06       | 0.95 to 1.18 | 0.319    | 1.11      | 0.98 to 1.25 | 0.103    |
| % Used prescription medication          | 9.0            | 7.1           | 1.28       | 1.05 to 1.56 | 0.015    | 1.33      | 1.06 to 1.66 | 0.014    |

\*RR adjusted for sex, age, social grade, government office region, and survey year.

\*\*Any cessation support includes behavioural support, nicotine replacement therapy (NRT) bought over-the-counter (OTC), e-cigarettes, and prescription medication.
